# Supplementary material for: The Canady Helios HERO Model: A Ventilator- Integrated Humidified Cold Atmospheric Plasma System for Lung Cancer Treatment and Respiratory Infection Applications
Source: Research Square preprint supplement (doi:10.21203/rs.3.rs-8651228/v1), 2026-01-30
Supplement: Supplementary file 1 [file 2d1aeebcfe7bcdc3e7792923.docx]

**Supplementary Table S1A: Post Hoc Tukey test for viability of A549 cells treated with the CHCP-HERO System with** **humidified at Air:O2=3:1 O2 16%**

| **Air:O2** | **O2 16%** |
| --- | --- |

| **Pair** | **Difference** | **SE** | **Q** | **Lower CI** | **Upper CI** | **Critical Mean** | **p-value** |
| --- | --- | --- | --- | --- | --- | --- | --- |
| Gas Mixture  4min vs CAP 1min | 0.0992 | 0.0095 | 10.407 | 0.0548 | 0.1435 | 0.0443 | **0.0001829** |
| Gas Mixture  4min vs CAP 2min | 0.2104 | 0.0095 | 22.081 | 0.166 | 0.2547 | 0.0443 | **1.93E-07** |
| Gas Mixture  4min vs CAP 3min | 0.3723 | 0.0095 | 39.079 | 0.328 | 0.4167 | 0.0443 | **4.40E-10** |
| Gas Mixture  4min vs CAP 4min | 0.4057 | 0.0095 | 42.585 | 0.3614 | 0.45 | 0.0443 | **2.59E-10** |
| CAP 1 min vs CAP 2min | 0.1112 | 0.0095 | 11.675 | 0.0669 | 0.1556 | 0.0443 | **6.806E-05** |
| CAP 1 min vs CAP 3min | 0.2732 | 0.0095 | 28.672 | 0.2288 | 0.3175 | 0.0443 | **1.47E-08** |
| CAP 1 min vs CAP 4min | 0.3066 | 0.0095 | 32.178 | 0.2622 | 0.3509 | 0.0443 | **3.61E-09** |
| CAP 2 min vs CAP 3min | 0.1619 | 0.0095 | 16.998 | 0.1176 | 0.2063 | 0.0443 | **2.236E-06** |
| CAP 2 min vs CAP 4min | 0.1953 | 0.0095 | 20.503 | 0.151 | 0.2397 | 0.0443 | **3.82E-07** |
| CAP 3 min vs CAP 4min | 0.0334 | 0.0095 | 3.5054 | -0.011 | 0.0777 | 0.0443 | **0.1717** |

**Supplementary Table S1B: Post Hoc Tukey test for viability of A549 cells treated with the CHCP-HERO System with** **humidified at Air: O2 =1:1 O2 24%**

| **Air:O2** | **O2 24%** |
| --- | --- |

| **Pair** | **Difference** | **SE** | **Q** | **Lower CI** | **Upper CI** | **Critical Mean** | **p-value** |
| --- | --- | --- | --- | --- | --- | --- | --- |
| Gas Mixture  4min vs CAP 1min | 0.1499 | 0.0077 | 19.558 | 0.1142 | 0.1856 | 0.0357 | **5.95E-07** |
| Gas Mixture  4min vs CAP 2min | 0.2401 | 0.0077 | 31.325 | 0.2044 | 0.2758 | 0.0357 | **5.07E-09** |
| Gas Mixture  4min vs CAP 3min | 0.3036 | 0.0077 | 39.607 | 0.2679 | 0.3393 | 0.0357 | **4.00E-10** |
| Gas Mixture  4min vs CAP 4min | 0.3162 | 0.0077 | 41.249 | 0.2805 | 0.3518 | 0.0357 | **3.10E-10** |
| CAP 1 min vs CAP 2min | 0.0902 | 0.0077 | 11.767 | 0.0545 | 0.1259 | 0.0357 | **0.00006355** |
| CAP 1 min vs CAP 3min | 0.1537 | 0.0077 | 20.049 | 0.118 | 0.1893 | 0.0357 | **4.71E-07** |
| CAP 1 min vs CAP 4min | 0.1663 | 0.0077 | 21.691 | 0.1306 | 0.2019 | 0.0357 | **2.27E-07** |
| CAP 2 min vs CAP 3min | 0.0635 | 0.0077 | 8.2821 | 0.0278 | 0.0992 | 0.0357 | **0.001168** |
| CAP 2 min vs CAP 4min | 0.0761 | 0.0077 | 9.9241 | 0.0404 | 0.1117 | 0.0357 | **0.0002724** |
| CAP 3 min vs CAP 4min | 0.0126 | 0.0077 | 1.6419 | -0.023 | 0.0483 | 0.0357 | **0.7722** |

**Supplementary Table S1C: Post Hoc Tukey test for viability of A549 cells treated with the CHCP-HERO System with** **humidified at Air: O2 =1:3 O2 32%**

| **Air:O2** | **O2 32%** |
| --- | --- |

| **Pair** | **Difference** | **SE** | **Q** | **Lower CI** | **Upper CI** | **Critical Mean** | **p-value** |
| --- | --- | --- | --- | --- | --- | --- | --- |
| Gas Mixture  4min vs CAP 1min | 0.0575 | 0.0182 | 3.1637 | -0.027 | 0.1421 | 0.0846 | **0.2419** |
| Gas Mixture  4min vs CAP 2min | 0.1616 | 0.0182 | 8.8916 | 0.077 | 0.2461 | 0.0846 | **0.0007** |
| Gas Mixture  4min vs CAP 3min | 0.2579 | 0.0182 | 14.192 | 0.1733 | 0.3425 | 0.0846 | **1E-05** |
| Gas Mixture  4min vs CAP 4min | 0.3128 | 0.0182 | 17.212 | 0.2282 | 0.3973 | 0.0846 | **2E-06** |
| CAP 1 min vs CAP 2min | 0.1041 | 0.0182 | 5.7279 | 0.0195 | 0.1887 | 0.0846 | **0.0155** |
| CAP 1 min vs CAP 3min | 0.2004 | 0.0182 | 11.028 | 0.1158 | 0.285 | 0.0846 | **0.0001** |
| CAP 1 min vs CAP 4min | 0.2553 | 0.0182 | 14.049 | 0.1707 | 0.3399 | 0.0846 | **1E-05** |
| CAP 2 min vs CAP 3min | 0.0963 | 0.0182 | 5.3 | 0.0117 | 0.1809 | 0.0846 | **0.0246** |
| CAP 2 min vs CAP 4min | 0.1512 | 0.0182 | 8.3208 | 0.0666 | 0.2358 | 0.0846 | **0.0011** |
| CAP 3 min vs CAP 4min | 0.0549 | 0.0182 | 3.0207 | -0.03 | 0.1395 | 0.0846 | **0.2775** |

**Supplementary Table S1D: Post Hoc Tukey test for viability of A549 cells treated with the CHCP-HERO System with** **humidified at Air:O2=1:1 O2 24%**

| **Air:O2 =1:1** | **O2 24%** |
| --- | --- |

| **Pair** | **Difference** | **SE** | **Q** | **Lower CI** | **Upper CI** | **Critical Mean** | **p-value** |
| --- | --- | --- | --- | --- | --- | --- | --- |
| Gas Mixture  17 min vs CAP 1min | 0.0728 | 0.011 | 6.6014 | 0.0188 | 0.1268 | 0.054 | **0.004868** |
| Gas Mixture  17 min vs CAP 2 min | 0.1824 | 0.011 | 16.544 | 0.1284 | 0.2364 | 0.054 | **6.91E-08** |
| Gas Mixture  17 min vs CAP 3 min | 0.2172 | 0.011 | 19.704 | 0.1632 | 0.2712 | 0.054 | **5.49E-09** |
| Gas Mixture  17 min vs CAP 4 min | 0.2375 | 0.011 | 21.543 | 0.1835 | 0.2915 | 0.054 | **1.43E-09** |
| Gas Mixture  17 min vs CAP 5 min | 0.275 | 0.011 | 24.941 | 0.221 | 0.3289 | 0.054 | **1.44E-10** |
| Gas Mixture  17 min vs CAP 10 min | 0.5219 | 0.011 | 47.341 | 0.4679 | 0.5759 | 0.054 | **1.08E-13** |
| Gas Mixture  17 min vs CAP 17 min | 0.9057 | 0.011 | 82.154 | 0.8517 | 0.9597 | 0.054 | **1.06E-13** |
| CAP 1min vs CAP 2 min | 0.1096 | 0.011 | 9.9429 | 0.0556 | 0.1636 | 0.054 | **6.173E-05** |
| CAP 1min vs CAP 3 min | 0.1444 | 0.011 | 13.102 | 0.0905 | 0.1984 | 0.054 | **1.789E-06** |
| CAP 1min vs CAP 4 min | 0.1647 | 0.011 | 14.941 | 0.1107 | 0.2187 | 0.054 | **2.93E-07** |
| CAP 1min vs CAP 5 min | 0.2022 | 0.011 | 18.339 | 0.1482 | 0.2562 | 0.054 | **1.57E-08** |
| CAP 1min vs CAP 10 min | 0.4491 | 0.011 | 40.739 | 0.3951 | 0.5031 | 0.054 | **1.55E-13** |
| CAP 1min vs CAP 17 min | 0.8329 | 0.011 | 75.553 | 0.7789 | 0.8869 | 0.054 | **1.06E-13** |
| CAP 2min vs CAP 3 min | 0.0348 | 0.011 | 3.1595 | -0.019 | 0.0888 | 0.054 | **0.3827** |
| CAP 2min vs CAP 4 min | 0.0551 | 0.011 | 4.9982 | 0.0011 | 0.1091 | 0.054 | **0.04367** |
| CAP 2min vs CAP 5 min | 0.0926 | 0.011 | 8.3962 | 0.0386 | 0.1465 | 0.054 | **0.0004342** |
| CAP 2min vs CAP 10 min | 0.3395 | 0.011 | 30.796 | 0.2855 | 0.3935 | 0.054 | **7.67E-12** |
| CAP 2min vs CAP 17 min | 0.7233 | 0.011 | 65.61 | 0.6693 | 0.7773 | 0.054 | **1.06E-13** |
| CAP 3min vs CAP 4 min | 0.0203 | 0.011 | 1.8386 | -0.034 | 0.0743 | 0.054 | **0.8861** |
| CAP 3min vs CAP 5 min | 0.0577 | 0.011 | 5.2367 | 0.0038 | 0.1117 | 0.054 | **0.0317** |
| CAP 3min vs CAP 10 min | 0.3047 | 0.011 | 27.637 | 0.2507 | 0.3587 | 0.054 | **3.29E-11** |
| CAP 3min vs CAP 17 min | 0.6885 | 0.011 | 62.451 | 0.6345 | 0.7425 | 0.054 | **1.07E-13** |
| CAP 4min vs CAP 5 min | 0.0375 | 0.011 | 3.398 | -0.017 | 0.0914 | 0.054 | **0.3029** |
| CAP 4min vs CAP 10 min | 0.2844 | 0.011 | 25.798 | 0.2304 | 0.3384 | 0.054 | **8.68E-11** |
| CAP 4min vs CAP 17 min | 0.6682 | 0.011 | 60.612 | 0.6142 | 0.7222 | 0.054 | **1.07E-13** |
| CAP 5min vs CAP 10 min | 0.2469 | 0.011 | 22.4 | 0.193 | 0.3009 | 0.054 | **7.77E-10** |
| CAP 5min vs CAP 17 min | 0.6307 | 0.011 | 57.214 | 0.5768 | 0.6847 | 0.054 | **1.07E-13** |
| CAP 10min vs CAP 17 min | 0.3838 | 0.011 | 34.814 | 0.3298 | 0.4378 | 0.054 | **1.24E-12** |

**Supplementary Table S2: Post Hoc Tukey test for viability of A549 cells treated with the CHCP-HERO System at 24-hour post treatment with humidified Air/O2 mixture and He + 0-100% humidity for 1-5 min.**

| **Post Hoc Tukey HSD / Tukey Kramer** | | |  |  |  |  |  |
| --- | --- | --- | --- | --- | --- | --- | --- |
| Humidified Air/O2 and He humidity 0% | | |  |  |  |  |  |
| **Pair** | **Difference** | **SE** | **Q** | **Lower CI** | **Upper CI** | **Critical Mean** | **p-value** |
| 1 min vs 2 mins | 0.002196 | 0.0219 | 0.1001 | -0.09994 | 0.1043 | 0.1021 | **1** |
| 1 min vs 3 mins | 0.02625 | 0.0219 | 1.1964 | -0.07588 | 0.1284 | 0.1021 | **0.9099** |
| 1 min vs 4 mins | 0.07056 | 0.0219 | 3.2154 | -0.03157 | 0.1727 | 0.1021 | **0.2299** |
| 1 min vs 5 mins | 0.09979 | 0.0219 | 4.5475 | -0.002344 | 0.2019 | 0.1021 | **0.05622** |
| 2 min vs 3 mins | 0.02406 | 0.0219 | 1.0964 | -0.07807 | 0.1262 | 0.1021 | **0.9321** |
| 2 min vs 4 mins | 0.06836 | 0.0219 | 3.1154 | -0.03377 | 0.1705 | 0.1021 | **0.2535** |
| 2 min vs 5 mins | 0.09759 | 0.0219 | 4.4474 | -0.00454 | 0.1997 | 0.1021 | **0.06273** |
| 3 min vs 4 mins | 0.0443 | 0.0219 | 2.019 | -0.05783 | 0.1464 | 0.1021 | **0.6255** |
| 3 min vs 5 mins | 0.07353 | 0.0219 | 3.351 | -0.0286 | 0.1757 | 0.1021 | **0.2009** |
| 4 min vs 5 mins | 0.02923 | 0.0219 | 1.332 | -0.0729 | 0.1314 | 0.1021 | **0.8742** |
|  |  |  |  |  |  |  |  |
| Humidified Air/O2 and He humidity 50% | | |  |  |  |  |  |
| **Pair** | **Difference** | **SE** | **Q** | **Lower CI** | **Upper CI** | **Critical Mean** | **p-value** |
| 1 min vs 2 mins | 0.1308 | 0.0098 | 13.394 | 0.08536 | 0.1763 | 0.04546 | **0.0000201** |
| 1 min vs 3 mins | 0.1464 | 0.0098 | 14.994 | 0.101 | 0.1919 | 0.04546 | **0.000007192** |
| 1 min vs 4 mins | 0.1771 | 0.0098 | 18.129 | 0.1316 | 0.2225 | 0.04546 | **0.000001217** |
| 1 min vs 5 mins | 0.4541 | 0.0098 | 46.498 | 0.4087 | 0.4996 | 0.04546 | **1.60E-10** |
| 2 min vs 3 mins | 0.01562 | 0.0098 | 1.5996 | -0.02983 | 0.06108 | 0.04546 | **0.7874** |
| 2 min vs 4 mins | 0.04625 | 0.0098 | 4.7352 | 0.0007902 | 0.0917 | 0.04546 | **0.04575** |
| 2 min vs 5 mins | 0.3233 | 0.0098 | 33.104 | 0.2779 | 0.3688 | 0.04546 | **2.51E-09** |
| 3 min vs 4 mins | 0.03062 | 0.0098 | 3.1356 | -0.01483 | 0.07608 | 0.04546 | **0.2486** |
| 3 min vs 5 mins | 0.3077 | 0.0098 | 31.504 | 0.2622 | 0.3531 | 0.04546 | **4.72E-09** |
| 4 min vs 5 mins | 0.2771 | 0.0098 | 28.369 | 0.2316 | 0.3225 | 0.04546 | **1.66E-08** |
|  |  |  |  |  |  |  |  |
| Humidified Air/O2 and He humidity 100% | | |  |  |  |  |  |
| **Pair** | **Difference** | **SE** | **Q** | **Lower CI** | **Upper CI** | **Critical Mean** | **p-value** |
| 1 min vs 2 mins | 0.1708 | 0.0093 | 18.46 | 0.1278 | 0.2139 | 0.04307 | **0.000001026** |
| 1 min vs 3 mins | 0.4839 | 0.0093 | 52.288 | 0.4408 | 0.527 | 0.04307 | **7.50E-11** |
| 1 min vs 4 mins | 0.8534 | 0.0093 | 92.208 | 0.8103 | 0.8964 | 0.04307 | **5.91E-14** |
| 1 min vs 5 mins | 0.856 | 0.0093 | 92.489 | 0.8129 | 0.899 | 0.04307 | **5.71E-14** |
| 2 min vs 3 mins | 0.3131 | 0.0093 | 33.828 | 0.27 | 0.3561 | 0.04307 | **1.91E-09** |
| 2 min vs 4 mins | 0.6825 | 0.0093 | 73.748 | 0.6395 | 0.7256 | 0.04307 | **1.91E-12** |
| 2 min vs 5 mins | 0.6851 | 0.0093 | 74.029 | 0.6421 | 0.7282 | 0.04307 | **1.81E-12** |
| 3 min vs 4 mins | 0.3695 | 0.0093 | 39.921 | 0.3264 | 0.4125 | 0.04307 | **3.80E-10** |
| 3 min vs 5 mins | 0.3721 | 0.0093 | 40.201 | 0.329 | 0.4151 | 0.04307 | **3.63E-10** |
| 4 min vs 5 mins | 0.002598 | 0.0093 | 0.2807 | -0.04048 | 0.04567 | 0.04307 | **0.9996** |
|  |  |  |  |  |  |  |  |
| Dry Air/O2 and He humidity 0% | | |  |  |  |  |  |
| **Pair** | **Difference** | **SE** | **Q** | **Lower CI** | **Upper CI** | **Critical Mean** | **p-value** |
| 1 min vs 2 mins | 0.002358 | 0.0085 | 0.2782 | -0.03709 | 0.0418 | 0.03945 | **0.9996** |
| 1 min vs 3 mins | 0.02366 | 0.0085 | 2.7916 | -0.01579 | 0.0631 | 0.03945 | **0.3428** |
| 1 min vs 4 mins | 0.05837 | 0.0085 | 6.8871 | 0.01892 | 0.09781 | 0.03945 | **0.004575** |
| 1 min vs 5 mins | 0.07697 | 0.0085 | 9.0819 | 0.03752 | 0.1164 | 0.03945 | **0.0005635** |
| 2 min vs 3 mins | 0.0213 | 0.0085 | 2.5134 | -0.01814 | 0.06075 | 0.03945 | **0.4352** |
| 2 min vs 4 mins | 0.05601 | 0.0085 | 6.6089 | 0.01656 | 0.09546 | 0.03945 | **0.006091** |
| 2 min vs 5 mins | 0.07461 | 0.0085 | 8.8037 | 0.03517 | 0.1141 | 0.03945 | **0.0007231** |
| 3 min vs 4 mins | 0.03471 | 0.0085 | 4.0955 | -0.004736 | 0.07415 | 0.03945 | **0.09199** |
| 3 min vs 5 mins | 0.05331 | 0.0085 | 6.2903 | 0.01386 | 0.09276 | 0.03945 | **0.008496** |
| 4 min vs 5 mins | 0.0186 | 0.0085 | 2.1948 | -0.02084 | 0.05805 | 0.03945 | **0.5555** |
|  |  |  |  |  |  |  |  |
| Dry Air/O2 and He humidity 50% | | |  |  |  |  |  |
| **Pair** | **Difference** | **SE** | **Q** | **Lower CI** | **Upper CI** | **Critical Mean** | **p-value** |
| 1 min vs 2 mins | 0.06904 | 0.0106 | 6.5157 | 0.01972 | 0.1184 | 0.04931 | **0.00671** |
| 1 min vs 3 mins | 0.1905 | 0.0106 | 17.977 | 0.1412 | 0.2398 | 0.04931 | **0.000001318** |
| 1 min vs 4 mins | 0.2314 | 0.0106 | 21.836 | 0.182 | 0.2807 | 0.04931 | **2.14E-07** |
| 1 min vs 5 mins | 0.4711 | 0.0106 | 44.46 | 0.4218 | 0.5204 | 0.04931 | **2.05E-10** |
| 2 min vs 3 mins | 0.1214 | 0.0106 | 11.461 | 0.07212 | 0.1708 | 0.04931 | **0.00007993** |
| 2 min vs 4 mins | 0.1623 | 0.0106 | 15.32 | 0.113 | 0.2116 | 0.04931 | **0.000005896** |
| 2 min vs 5 mins | 0.402 | 0.0106 | 37.944 | 0.3527 | 0.4514 | 0.04931 | **5.55E-10** |
| 3 min vs 4 mins | 0.04089 | 0.0106 | 3.8589 | -0.008428 | 0.0902 | 0.04931 | **0.1186** |
| 3 min vs 5 mins | 0.2806 | 0.0106 | 26.483 | 0.2313 | 0.3299 | 0.04931 | **3.46E-08** |
| 4 min vs 5 mins | 0.2397 | 0.0106 | 22.624 | 0.1904 | 0.289 | 0.04931 | **1.55E-07** |
|  |  |  |  |  |  |  |  |
| Dry Air/O2 and He humidity 100% | | |  |  |  |  |  |
| **Pair** | **Difference** | **SE** | **Q** | **Lower CI** | **Upper CI** | **Critical Mean** | **p-value** |
| 1 min vs 2 mins | 0.1521 | 0.0113 | 13.416 | 0.0993 | 0.2048 | 0.05275 | **0.00001981** |
| 1 min vs 3 mins | 0.4621 | 0.0113 | 40.767 | 0.4093 | 0.5148 | 0.05275 | **3.32E-10** |
| 1 min vs 4 mins | 0.7893 | 0.0113 | 69.635 | 0.7365 | 0.842 | 0.05275 | **4.26E-12** |
| 1 min vs 5 mins | 0.7971 | 0.0113 | 70.331 | 0.7444 | 0.8499 | 0.05275 | **3.73E-12** |
| 2 min vs 3 mins | 0.31 | 0.0113 | 27.351 | 0.2572 | 0.3628 | 0.05275 | **2.47E-08** |
| 2 min vs 4 mins | 0.6372 | 0.0113 | 56.22 | 0.5845 | 0.69 | 0.05275 | **4.24E-11** |
| 2 min vs 5 mins | 0.6451 | 0.0113 | 56.915 | 0.5923 | 0.6978 | 0.05275 | **3.81E-11** |
| 3 min vs 4 mins | 0.3272 | 0.0113 | 28.869 | 0.2744 | 0.38 | 0.05275 | **1.36E-08** |
| 3 min vs 5 mins | 0.3351 | 0.0113 | 29.564 | 0.2823 | 0.3878 | 0.05275 | **1.03E-08** |
| 4 min vs 5 mins | 0.007883 | 0.0113 | 0.6955 | -0.04487 | 0.06064 | 0.05275 | **0.9864** |

**Supplementary Table S3: Post Hoc Tukey test for viability of A549 cells treated with the CHCP-HERO System with Air/O2 mixture and Air/O2 Separate treatment.**

|  | **Mins** | **Pair** | **Difference** | **SE** | **Q** | **Lower CI** | **Upper CI** | **Critical Mean** | **p-value** |
| --- | --- | --- | --- | --- | --- | --- | --- | --- | --- |
| Air/O2 mixture | 1 min | 40V vs 35V | 0.0855 | 0.03494 | 2.4471 | -0.052 | 0.2227 | 0.1372 | 0.1586 |
| 2 min | 40V vs 35V | 0.09026 | 0.0271 | 3.3303 | -0.016 | 0.1967 | 0.1064 | 0.0781 |
| 3 min | 40V vs 35V | 0.09647 | 0.008972 | 10.752 | 0.0612 | 0.1317 | 0.0352 | 0.001608 |
| 4 min | 40V vs 35V | 0.12 | 0.0143 | 8.3882 | 0.0638 | 0.1762 | 0.0562 | 0.004051 |
| 5 min | 40V vs 35V | 0.2182 | 0.01727 | 12.633 | 0.1504 | 0.286 | 0.0678 | 0.0008706 |
| 6 min | 40V vs 35V | 0.3324 | 0.01815 | 18.314 | 0.2612 | 0.4037 | 0.0713 | 0.000209 |
| 7 min | 40V vs 35V | 0.604 | 0.007623 | 79.235 | 0.5741 | 0.634 | 0.0299 | 1.29E-08 |
| 8 min | 40V vs 35V | 0.7464 | 0.008638 | 86.409 | 0.7125 | 0.7803 | 0.0339 | 2.47E-09 |
| 9 min | 40V vs 35V | 0.7455 | 0.009086 | 82.055 | 0.7099 | 0.7812 | 0.0357 | 6.84E-09 |
| 10 min | 40V vs 35V | 0.7212 | 0.00834 | 86.476 | 0.6885 | 0.754 | 0.0328 | 2.43E-09 |
|  |  |  |  |  |  |  |  |  |  |
| Air/O2 Separate | 1 min | 40V vs 35V | 0.04687 | 0.02211 | 2.12 | -0.04 | 0.1337 | 0.0868 | 0.2082 |
| 2 min | 40V vs 35V | 0.069 | 0.07474 | 0.9232 | -0.225 | 0.3624 | 0.2934 | 0.5495 |
| 3 min | 40V vs 35V | 0.03613 | 0.06356 | 0.5684 | -0.214 | 0.2857 | 0.2496 | 0.7083 |
| 4 min | 40V vs 35V | 0.005304 | 0.06864 | 0.0773 | -0.264 | 0.2748 | 0.2695 | 0.959 |
| 5 min | 40V vs 35V | 0.000022 | 0.0527 | 0.0004 | -0.207 | 0.207 | 0.2069 | 0.9998 |
| 6 min | 40V vs 35V | 0.05836 | 0.04078 | 1.4309 | -0.102 | 0.2185 | 0.1601 | 0.3689 |
| 7 min | 40V vs 35V | 0.09717 | 0.05022 | 1.9349 | -0.1 | 0.2943 | 0.1972 | 0.2431 |
| 8 min | 40V vs 35V | 0.1252 | 0.04382 | 2.8581 | -0.047 | 0.2973 | 0.1721 | 0.1134 |
| 9 min | 40V vs 35V | 0.1748 | 0.06009 | 2.9096 | -0.061 | 0.4108 | 0.2359 | 0.1088 |
| 10 min | 40V vs 35V | 0.2235 | 0.09756 | 2.2904 | -0.16 | 0.6065 | 0.3831 | 0.1806 |
| 11 min | 40V vs 35V | 0.2751 | 0.08389 | 3.2787 | -0.054 | 0.6045 | 0.3294 | 0.08128 |
| 12 min | 40V vs 35V | 0.3285 | 0.06199 | 5.2994 | 0.0851 | 0.5719 | 0.2434 | 0.02 |
| 13 min | 40V vs 35V | 0.4275 | 0.08588 | 4.977 | 0.0902 | 0.7647 | 0.3372 | 0.02447 |
| 14 min | 40V vs 35V | 0.4334 | 0.05797 | 7.4758 | 0.2058 | 0.661 | 0.2276 | 0.006146 |
| 15 min | 40V vs 35V | 0.4016 | 0.07028 | 5.7143 | 0.1256 | 0.6775 | 0.2759 | 0.0156 |
| 16 min | 40V vs 35V | 0.4672 | 0.04171 | 11.201 | 0.3034 | 0.6309 | 0.1638 | 0.001377 |

**Supplementary Table S4A: Post Hoc Tukey test for quantification of hydrogen peroxide (H₂O₂),** **production rate by the Canady Helios™ Cold Plasma HERO™ System.**

|  | **Pair** | **Difference** | **SE** | **Q** | **Lower CI** | **Upper CI** | **Critical Mean** | **p-value** |
| --- | --- | --- | --- | --- | --- | --- | --- | --- |
|  | No Treatment-Gas only | 97.104 | 19.856 | 4.89 | -2.332 | 196.54 | 99.436 | 0.0591 |
|  | No Treatment-35V Mix 15 min | 521.66 | 19.856 | 26.272 | 422.227 | 621.099 | 99.436 | 2.11E-12 |
|  | No Treatment-35V Mix 4+4+4+3 min | 577.17 | 19.856 | 29.068 | 477.732 | 676.604 | 99.436 | 7.32E-13 |
|  | No Treatment-40V Mix 8 min | 731.34 | 19.856 | 36.833 | 631.908 | 830.78 | 99.436 | 5.15E-13 |
|  | No Treatment-40V Mix 3+3+2 min | 468.52 | 19.856 | 23.596 | 369.082 | 567.954 | 99.436 | 1.42E-11 |
|  | No Treatment-35V Sep 15 min | 469.03 | 19.856 | 23.622 | 369.595 | 568.467 | 99.436 | 1.39E-11 |
|  | No Treatment-35V Sep 4+4+4+3 min | 468.27 | 19.856 | 23.584 | 368.838 | 567.71 | 99.436 | 1.43E-11 |
|  | No Treatment-40V Sep 15 min | 809.67 | 19.856 | 40.777 | 710.235 | 909.107 | 99.436 | 5.11E-13 |
|  | No Treatment-40V Sep 4+4+4+3 min | 949.45 | 19.856 | 47.817 | 850.015 | 1048.887 | 99.436 | 5.11E-13 |
|  | Gas only-35V Mix 15 min | 424.56 | 19.856 | 21.382 | 325.123 | 523.995 | 99.436 | 8.55E-11 |
|  | Gas only-35V Mix 4+4+4+3 min | 480.06 | 19.856 | 24.177 | 380.628 | 579.5 | 99.436 | 9.03E-12 |
|  | Gas only-40V Mix 8 min | 634.24 | 19.856 | 31.942 | 534.804 | 733.676 | 99.436 | 5.56E-13 |
|  | Gas only-40V Mix 3+3+2 min | 371.41 | 19.856 | 18.705 | 271.978 | 470.85 | 99.436 | 9.38E-10 |
|  | Gas only-35V Sep 15 min | 371.93 | 19.856 | 18.731 | 272.491 | 471.363 | 99.436 | 9.15E-10 |
|  | Gas only-35V Sep 4+4+4+3 min | 371.17 | 19.856 | 18.693 | 271.734 | 470.606 | 99.436 | 9.49E-10 |
|  | Gas only-40V Sep 15 min | 712.57 | 19.856 | 35.887 | 613.131 | 812.003 | 99.436 | 5.17E-13 |
|  | Gas only-40V Sep 4+4+4+3 min | 852.35 | 19.856 | 42.927 | 752.911 | 951.783 | 99.436 | 5.11E-13 |
|  | 35V Mix 15 min-35V Mix 4+4+4+3 min | 55.505 | 19.856 | 2.795 | -43.931 | 154.941 | 99.436 | 0.623 |
|  | 35V Mix 15 min-40V Mix 8 min | 209.68 | 19.856 | 10.56 | 110.245 | 309.117 | 99.436 | 0.0000122 |
|  | 35V Mix 15 min-40V Mix 3+3+2 min | 53.145 | 19.856 | 2.677 | -46.29 | 152.581 | 99.436 | 0.674 |
|  | 35V Mix 15 min-35V Sep 15 min | 52.633 | 19.856 | 2.651 | -46.803 | 152.069 | 99.436 | 0.685 |
|  | 35V Mix 15 min-35V Sep 4+4+4+3 min | 53.39 | 19.856 | 2.689 | -46.046 | 152.826 | 99.436 | 0.668 |
|  | 35V Mix 15 min-40V Sep 15 min | 288.01 | 19.856 | 14.505 | 188.572 | 387.444 | 99.436 | 7.97E-08 |
|  | 35V Mix 15 min-40V Sep 4+4+4+3 min | 427.79 | 19.856 | 21.545 | 328.352 | 527.224 | 99.436 | 7.46E-11 |
|  | 35V Mix 4+4+4+3 min-40V Mix 8 min | 154.18 | 19.856 | 7.765 | 54.74 | 253.612 | 99.436 | 0.000748 |
|  | 35V Mix 4+4+4+3 min-40V Mix 3+3+2 min | 108.65 | 19.856 | 5.472 | 9.215 | 208.087 | 99.436 | 0.0254 |
|  | 35V Mix 4+4+4+3 min-35V Sep 15 min | 108.14 | 19.856 | 5.446 | 8.702 | 207.574 | 99.436 | 0.0263 |
|  | 35V Mix 4+4+4+3 min-35V Sep 4+4+4+3 min | 108.9 | 19.856 | 5.484 | 9.459 | 208.331 | 99.436 | 0.0249 |
|  | 35V Mix 4+4+4+3 min-40V Sep 15 min | 232.5 | 19.856 | 11.71 | 133.067 | 331.939 | 99.436 | 0.00000256 |
|  | 35V Mix 4+4+4+3 min-40V Sep 4+4+4+3 min | 372.28 | 19.856 | 18.749 | 272.847 | 471.719 | 99.436 | 9.00E-10 |
|  | 40V Mix 8 min-40V Mix 3+3+2 min | 262.83 | 19.856 | 13.237 | 163.391 | 362.263 | 99.436 | 3.63E-07 |
|  | 40V Mix 8 min-35V Sep 15 min | 262.31 | 19.856 | 13.211 | 162.878 | 361.75 | 99.436 | 3.75E-07 |
|  | 40V Mix 8 min-35V Sep 4+4+4+3 min | 263.07 | 19.856 | 13.249 | 163.635 | 362.507 | 99.436 | 3.58E-07 |
|  | 40V Mix 8 min-40V Sep 15 min | 78.327 | 19.856 | 3.945 | -21.109 | 177.763 | 99.436 | 0.205 |
|  | 40V Mix 8 min-40V Sep 4+4+4+3 min | 218.11 | 19.856 | 10.984 | 118.671 | 317.543 | 99.436 | 0.00000679 |
|  | 40V Mix 3+3+2 min-35V Sep 15 min | 0.513 | 19.856 | 0.0258 | -98.923 | 99.949 | 99.436 | 1 |
|  | 40V Mix 3+3+2 min-35V Sep 4+4+4+3 min | 0.244 | 19.856 | 0.0123 | -99.192 | 99.68 | 99.436 | 1 |
|  | 40V Mix 3+3+2 min-40V Sep 15 min | 341.15 | 19.856 | 17.181 | 241.717 | 440.589 | 99.436 | 4.27E-09 |
|  | 40V Mix 3+3+2 min-40V Sep 4+4+4+3 min | 480.93 | 19.856 | 24.221 | 381.497 | 580.369 | 99.436 | 8.73E-12 |
|  | 35V Sep 15 min-35V Sep 4+4+4+3 min | 0.757 | 19.856 | 0.0381 | -98.679 | 100.193 | 99.436 | 1 |
|  | 35V Sep 15 min-40V Sep 15 min | 340.64 | 19.856 | 17.156 | 241.204 | 440.076 | 99.436 | 4.39E-09 |
|  | 35V Sep 15 min-40V Sep 4+4+4+3 min | 480.42 | 19.856 | 24.195 | 380.984 | 579.856 | 99.436 | 8.90E-12 |
|  | 35V Sep 4+4+4+3 min-40V Sep 15 min | 341.4 | 19.856 | 17.194 | 241.962 | 440.833 | 99.436 | 4.22E-09 |
|  | 35V Sep 4+4+4+3 min-40V Sep 4+4+4+3 min | 481.18 | 19.856 | 24.233 | 381.742 | 580.613 | 99.436 | 8.65E-12 |
|  | 40V Sep 15 min-40V Sep 4+4+4+3 min | 139.78 | 19.856 | 7.04 | 40.344 | 239.216 | 99.436 | 0.00229 |

**Supplementary Table S4B: Post Hoc Tukey test for quantification of Nitrite (NO2-) ,** **production rate by the Canady Helios™ Cold Plasma HERO™ System.**

| **Pair** | **Difference** | **SE** | **Q** | **Lower CI** | **Upper CI** | **Critical Mean** | **p-value** |
| --- | --- | --- | --- | --- | --- | --- | --- |
| No Treatment-Gas only | 0.416 | 1.372 | 0.304 | -6.454 | 7.287 | 6.871 | 1 |
| No Treatment-35V Mix 15 min | 13.076 | 1.372 | 9.531 | 6.205 | 19.947 | 6.871 | 0.0000529 |
| No Treatment-35V Mix 4+4+4+3 min | 14.809 | 1.372 | 10.794 | 7.938 | 21.679 | 6.871 | 8.83E-06 |
| No Treatment-40V Mix 8 min | 9.095 | 1.372 | 6.629 | 2.225 | 15.966 | 6.871 | 0.00433 |
| No Treatment-40V Mix 3+3+2 min | 9.558 | 1.372 | 6.967 | 2.687 | 16.429 | 6.871 | 0.00257 |
| No Treatment-35V Sep 15 min | 14.845 | 1.372 | 10.82 | 7.974 | 21.715 | 6.871 | 8.51E-06 |
| No Treatment-35V Sep 4+4+4+3 min | 13.793 | 1.372 | 10.053 | 6.922 | 20.663 | 6.871 | 0.000025 |
| No Treatment-40V Sep 15 min | 29.956 | 1.372 | 21.834 | 23.085 | 36.827 | 6.871 | 5.86E-11 |
| No Treatment-40V Sep 4+4+4+3 min | 43.489 | 1.372 | 31.698 | 36.619 | 50.36 | 6.871 | 5.62E-13 |
| Gas only-35V Mix 15 min | 12.66 | 1.372 | 9.227 | 5.789 | 19.531 | 6.871 | 0.0000826 |
| Gas only-35V Mix 4+4+4+3 min | 14.392 | 1.372 | 10.49 | 7.521 | 21.263 | 6.871 | 0.0000135 |
| Gas only-40V Mix 8 min | 8.679 | 1.372 | 6.326 | 1.808 | 15.55 | 6.871 | 0.00692 |
| Gas only-40V Mix 3+3+2 min | 9.142 | 1.372 | 6.663 | 2.271 | 16.012 | 6.871 | 0.00411 |
| Gas only-35V Sep 15 min | 14.428 | 1.372 | 10.516 | 7.557 | 21.299 | 6.871 | 0.000013 |
| Gas only-35V Sep 4+4+4+3 min | 13.376 | 1.372 | 9.749 | 6.505 | 20.247 | 6.871 | 0.0000386 |
| Gas only-40V Sep 15 min | 29.54 | 1.372 | 21.531 | 22.669 | 36.41 | 6.871 | 7.55E-11 |
| Gas only-40V Sep 4+4+4+3 min | 43.073 | 1.372 | 31.395 | 36.202 | 49.944 | 6.871 | 5.71E-13 |
| 35V Mix 15 min-35V Mix 4+4+4+3 min | 1.732 | 1.372 | 1.263 | -5.138 | 8.603 | 6.871 | 0.995 |
| 35V Mix 15 min-40V Mix 8 min | 3.981 | 1.372 | 2.902 | -2.89 | 10.852 | 6.871 | 0.577 |
| 35V Mix 15 min-40V Mix 3+3+2 min | 3.518 | 1.372 | 2.564 | -3.352 | 10.389 | 6.871 | 0.721 |
| 35V Mix 15 min-35V Sep 15 min | 1.768 | 1.372 | 1.289 | -5.102 | 8.639 | 6.871 | 0.994 |
| 35V Mix 15 min-35V Sep 4+4+4+3 min | 0.716 | 1.372 | 0.522 | -6.154 | 7.587 | 6.871 | 1 |
| 35V Mix 15 min-40V Sep 15 min | 16.88 | 1.372 | 12.303 | 10.009 | 23.751 | 6.871 | 1.18E-06 |
| 35V Mix 15 min-40V Sep 4+4+4+3 min | 30.413 | 1.372 | 22.167 | 23.543 | 37.284 | 6.871 | 4.46E-11 |
| 35V Mix 4+4+4+3 min-40V Mix 8 min | 5.713 | 1.372 | 4.164 | -1.158 | 12.584 | 6.871 | 0.157 |
| 35V Mix 4+4+4+3 min-40V Mix 3+3+2 min | 5.251 | 1.372 | 3.827 | -1.62 | 12.121 | 6.871 | 0.236 |
| 35V Mix 4+4+4+3 min-35V Sep 15 min | 0.036 | 1.372 | 0.0262 | -6.835 | 6.907 | 6.871 | 1 |
| 35V Mix 4+4+4+3 min-35V Sep 4+4+4+3 min | 1.016 | 1.372 | 0.741 | -5.855 | 7.887 | 6.871 | 1 |
| 35V Mix 4+4+4+3 min-40V Sep 15 min | 15.147 | 1.372 | 11.041 | 8.277 | 22.018 | 6.871 | 6.29E-06 |
| 35V Mix 4+4+4+3 min-40V Sep 4+4+4+3 min | 28.681 | 1.372 | 20.905 | 21.81 | 35.552 | 6.871 | 1.28E-10 |
| 40V Mix 8 min-40V Mix 3+3+2 min | 0.463 | 1.372 | 0.337 | -6.408 | 7.333 | 6.871 | 1 |
| 40V Mix 8 min-35V Sep 15 min | 5.749 | 1.372 | 4.19 | -1.122 | 12.62 | 6.871 | 0.152 |
| 40V Mix 8 min-35V Sep 4+4+4+3 min | 4.697 | 1.372 | 3.424 | -2.173 | 11.568 | 6.871 | 0.364 |
| 40V Mix 8 min-40V Sep 15 min | 20.861 | 1.372 | 15.205 | 13.99 | 27.731 | 6.871 | 3.59E-08 |
| 40V Mix 8 min-40V Sep 4+4+4+3 min | 34.394 | 1.372 | 25.069 | 27.523 | 41.265 | 6.871 | 4.66E-12 |
| 40V Mix 3+3+2 min-35V Sep 15 min | 5.287 | 1.372 | 3.853 | -1.584 | 12.157 | 6.871 | 0.229 |
| 40V Mix 3+3+2 min-35V Sep 4+4+4+3 min | 4.235 | 1.372 | 3.086 | -2.636 | 11.105 | 6.871 | 0.498 |
| 40V Mix 3+3+2 min-40V Sep 15 min | 20.398 | 1.372 | 14.868 | 13.527 | 27.269 | 6.871 | 5.25E-08 |
| 40V Mix 3+3+2 min-40V Sep 4+4+4+3 min | 33.932 | 1.372 | 24.732 | 27.061 | 40.802 | 6.871 | 5.95E-12 |
| 35V Sep 15 min-35V Sep 4+4+4+3 min | 1.052 | 1.372 | 0.767 | -5.819 | 7.923 | 6.871 | 1 |
| 35V Sep 15 min-40V Sep 15 min | 15.112 | 1.372 | 11.014 | 8.241 | 21.982 | 6.871 | 6.52E-06 |
| 35V Sep 15 min-40V Sep 4+4+4+3 min | 28.645 | 1.372 | 20.878 | 21.774 | 35.516 | 6.871 | 1.31E-10 |
| 35V Sep 4+4+4+3 min-40V Sep 15 min | 16.163 | 1.372 | 11.781 | 9.293 | 23.034 | 6.871 | 2.33E-06 |
| 35V Sep 4+4+4+3 min-40V Sep 4+4+4+3 min | 29.697 | 1.372 | 21.645 | 22.826 | 36.568 | 6.871 | 6.86E-11 |
| 40V Sep 15 min-40V Sep 4+4+4+3 min | 13.533 | 1.372 | 9.864 | 6.663 | 20.404 | 6.871 | 0.0000327 |

**Supplementary Table S4C: Post Hoc Tukey test for quantification of Nitrate (NO3-),** **production rate by the Canady Helios™ Cold Plasma HERO™ System.**

| **Pair** | **Difference** | **SE** | **Q** | **Lower CI** | **Upper CI** | **Critical Mean** | **p-value** |
| --- | --- | --- | --- | --- | --- | --- | --- |
| No Treatment-Gas only | 0.0077 | 0.226 | 0.0342 | -1.123 | 1.139 | 1.131 | 1 |
| No Treatment-35V Mix 15 min | 2.263 | 0.226 | 10.018 | 1.131 | 3.394 | 1.131 | 2.62E-05 |
| No Treatment-35V Mix 4+4+4+3 min | 3.363 | 0.226 | 14.892 | 2.232 | 4.494 | 1.131 | 5.11E-08 |
| No Treatment-40V Mix 8 min | 1.33 | 0.226 | 5.888 | 0.199 | 2.461 | 1.131 | 0.0135 |
| No Treatment-40V Mix 3+3+2 min | 2.576 | 0.226 | 11.407 | 1.445 | 3.707 | 1.131 | 3.83E-06 |
| No Treatment-35V Sep 15 min | 1.32 | 0.226 | 5.846 | 0.189 | 2.451 | 1.131 | 0.0144 |
| No Treatment-35V Sep 4+4+4+3 min | 0.489 | 0.226 | 2.164 | -0.642 | 1.62 | 1.131 | 0.865 |
| No Treatment-40V Sep 15 min | 0.226 | 0.226 | 1.003 | -0.905 | 1.358 | 1.131 | 0.999 |
| No Treatment-40V Sep 4+4+4+3 min | 7.485 | 0.226 | 33.141 | 6.354 | 8.616 | 1.131 | 5.36E-13 |
| Gas only-35V Mix 15 min | 2.27 | 0.226 | 10.052 | 1.139 | 3.401 | 1.131 | 0.000025 |
| Gas only-35V Mix 4+4+4+3 min | 3.371 | 0.226 | 14.926 | 2.24 | 4.502 | 1.131 | 4.91E-08 |
| Gas only-40V Mix 8 min | 1.322 | 0.226 | 5.854 | 0.191 | 2.453 | 1.131 | 0.0143 |
| Gas only-40V Mix 3+3+2 min | 2.568 | 0.226 | 11.372 | 1.437 | 3.699 | 1.131 | 4.01E-06 |
| Gas only-35V Sep 15 min | 1.313 | 0.226 | 5.812 | 0.182 | 2.444 | 1.131 | 0.0152 |
| Gas only-35V Sep 4+4+4+3 min | 0.496 | 0.226 | 2.198 | -0.635 | 1.627 | 1.131 | 0.854 |
| Gas only-40V Sep 15 min | 0.219 | 0.226 | 0.969 | -0.912 | 1.35 | 1.131 | 0.999 |
| Gas only-40V Sep 4+4+4+3 min | 7.493 | 0.226 | 33.175 | 6.361 | 8.624 | 1.131 | 5.35E-13 |
| 35V Mix 15 min-35V Mix 4+4+4+3 min | 1.101 | 0.226 | 4.874 | -0.03 | 2.232 | 1.131 | 0.0605 |
| 35V Mix 15 min-40V Mix 8 min | 3.592 | 0.226 | 15.906 | 2.461 | 4.723 | 1.131 | 1.65E-08 |
| 35V Mix 15 min-40V Mix 3+3+2 min | 4.839 | 0.226 | 21.424 | 3.708 | 5.97 | 1.131 | 8.25E-11 |
| 35V Mix 15 min-35V Sep 15 min | 3.583 | 0.226 | 15.864 | 2.452 | 4.714 | 1.131 | 1.73E-08 |
| 35V Mix 15 min-35V Sep 4+4+4+3 min | 1.774 | 0.226 | 7.854 | 0.643 | 2.905 | 1.131 | 0.000653 |
| 35V Mix 15 min-40V Sep 15 min | 2.489 | 0.226 | 11.021 | 1.358 | 3.62 | 1.131 | 6.46E-06 |
| 35V Mix 15 min-40V Sep 4+4+4+3 min | 5.222 | 0.226 | 23.123 | 4.091 | 6.353 | 1.131 | 2.06E-11 |
| 35V Mix 4+4+4+3 min-40V Mix 8 min | 4.693 | 0.226 | 20.78 | 3.562 | 5.824 | 1.131 | 1.43E-10 |
| 35V Mix 4+4+4+3 min-40V Mix 3+3+2 min | 5.94 | 0.226 | 26.299 | 4.809 | 7.071 | 1.131 | 2.08E-12 |
| 35V Mix 4+4+4+3 min-35V Sep 15 min | 4.684 | 0.226 | 20.738 | 3.553 | 5.815 | 1.131 | 1.48E-10 |
| 35V Mix 4+4+4+3 min-35V Sep 4+4+4+3 min | 2.875 | 0.226 | 12.728 | 1.744 | 4.006 | 1.131 | 6.85E-07 |
| 35V Mix 4+4+4+3 min-40V Sep 15 min | 3.59 | 0.226 | 15.895 | 2.459 | 4.721 | 1.131 | 1.67E-08 |
| 35V Mix 4+4+4+3 min-40V Sep 4+4+4+3 min | 4.121 | 0.226 | 18.249 | 2.99 | 5.252 | 1.131 | 1.46E-09 |
| 40V Mix 8 min-40V Mix 3+3+2 min | 1.246 | 0.226 | 5.518 | 0.115 | 2.377 | 1.131 | 0.0237 |
| 40V Mix 8 min-35V Sep 15 min | 0.0095 | 0.226 | 0.0419 | -1.122 | 1.14 | 1.131 | 1 |
| 40V Mix 8 min-35V Sep 4+4+4+3 min | 1.819 | 0.226 | 8.052 | 0.688 | 2.95 | 1.131 | 0.000482 |
| 40V Mix 8 min-40V Sep 15 min | 1.103 | 0.226 | 4.885 | -0.028 | 2.234 | 1.131 | 0.0595 |
| 40V Mix 8 min-40V Sep 4+4+4+3 min | 8.815 | 0.226 | 39.029 | 7.684 | 9.946 | 1.131 | 5.12E-13 |
| 40V Mix 3+3+2 min-35V Sep 15 min | 1.256 | 0.226 | 5.56 | 0.125 | 2.387 | 1.131 | 0.0222 |
| 40V Mix 3+3+2 min-35V Sep 4+4+4+3 min | 3.065 | 0.226 | 13.57 | 1.934 | 4.196 | 1.131 | 2.42E-07 |
| 40V Mix 3+3+2 min-40V Sep 15 min | 2.35 | 0.226 | 10.404 | 1.219 | 3.481 | 1.131 | 1.52E-05 |
| 40V Mix 3+3+2 min-40V Sep 4+4+4+3 min | 10.061 | 0.226 | 44.547 | 8.93 | 11.192 | 1.131 | 5.11E-13 |
| 35V Sep 15 min-35V Sep 4+4+4+3 min | 1.809 | 0.226 | 8.01 | 0.678 | 2.94 | 1.131 | 0.000514 |
| 35V Sep 15 min-40V Sep 15 min | 1.094 | 0.226 | 4.843 | -0.037 | 2.225 | 1.131 | 0.0632 |
| 35V Sep 15 min-40V Sep 4+4+4+3 min | 8.805 | 0.226 | 38.987 | 7.674 | 9.936 | 1.131 | 5.12E-13 |
| 35V Sep 4+4+4+3 min-40V Sep 15 min | 0.715 | 0.226 | 3.167 | -0.416 | 1.846 | 1.131 | 0.464 |
| 35V Sep 4+4+4+3 min-40V Sep 4+4+4+3 min | 6.996 | 0.226 | 30.977 | 5.865 | 8.127 | 1.131 | 5.85E-13 |
| 40V Sep 15 min-40V Sep 4+4+4+3 min | 7.711 | 0.226 | 34.143 | 6.58 | 8.842 | 1.131 | 5.26E-13 |

|  | |  |  | | | |  | | |
| --- | --- | --- | --- | --- | --- | --- | --- | --- | --- |
|  |  | | | **1st Treatment** | | **2nd Treatment** | | | **3rd Treatment** | | | **4th Treatment** | |
| Vital status | **Baseline** | | | **During** | **Post** | **During** | | **Post** | **During** | | **Post** | **During** | **Post** |
| Body temp  (C) | 33.7 | | | 34.5 | 35 | 35.2 | | 35.3 | 35.3 | | 35.3 | 35.3 | 34.7 |
| End tidal CO2 (mmHg) | 33 | | | 43 | 36 | 43 | | 31 | 22 | | 27 | 29 | 28 |
| O2 Saturation  (%) | 100 | | | 98 | 99 | 97 | | 100 | 97 | | 99 | 98 | 99 |
| B.P.  (mmHg) | 102/58 | | | 100/51 | 90/50 | 103/59 | | 110/64 | 97/54 | | 103/51 | 94/50 | 100/52 |
| pulse  (Beats/min) | 87 | | | 92 | 83 | 87 | | 94 | 102 | | 98 | 97 | 89 |

**Supplementary Table S5 showing measurements of core body temperature, end-tidal CO₂, oxygen saturation (SpO₂), arterial blood pressure, and pulse rate during and after CAP treatment.**
