# Supplementary material for: The Canady Helios HERO Model: A Ventilator- Integrated Humidified Cold Atmospheric Plasma System for Lung Cancer Treatment and Respiratory Infection Applications
Source: Research Square preprint supplement (doi:10.21203/rs.3.rs-8651228/v1), 2026-01-30
Supplement: Supplementary file 2 [file 4f8420bced1c566f5badc24d.docx]

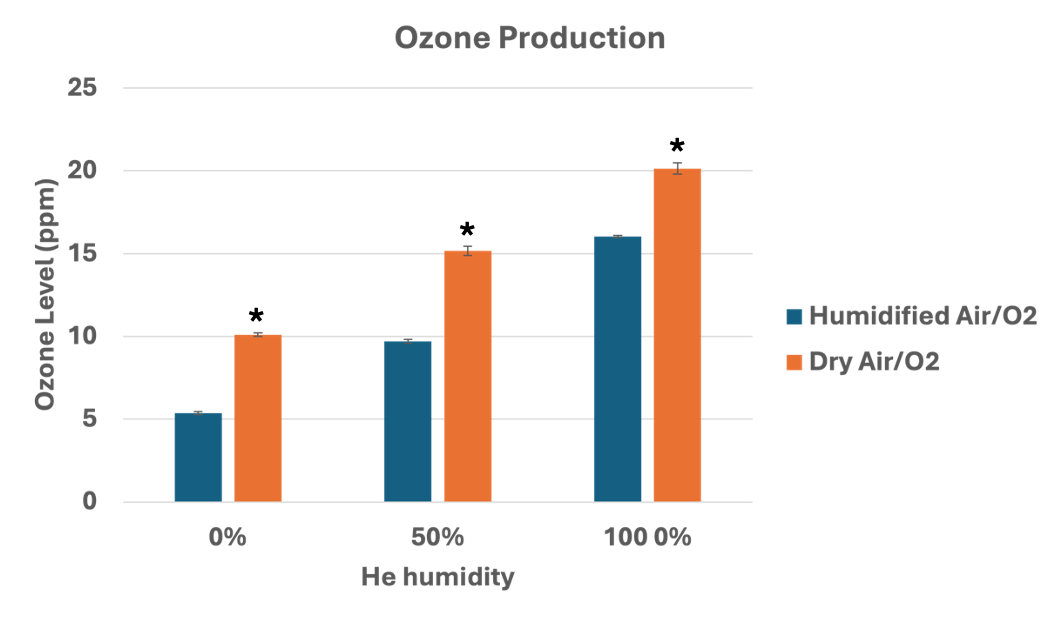


Figure S1: Ozone production rate by the Canady Helios Cold Plasma HERO System with humidified or dry Air/O2 mixture and He + 0-100% humidity at 70V with 114 khz frequency . The data represent the mean ± SEM from *n* = 3 biological replicates, each containing triplicate technical measurements. Significance determined using paired two tailed Student t-test at (*p > 0.05).

Figure S2: Body temperature recording during HERO treatment

Figure S3: End tidal CO2 recording during HERO treatment

Figure S4: O2 saturation recording during HERO treatment

Figure S5: Pulse recording during HERO treatment
